# Supplementary material for: Evaluation of Biochemical Serum Indicators for Polycystic Ovarian Syndrome Diagnosis among Women with Obesity
Source: Preprints.org preprint supplement (doi:10.20944/preprints202408.1916.v1), 2024-08-27
Supplement: Supplementary file 1 [file supplementary]

**APPENDIX**

| Indicator | Control (A)  N=46 | Obesity | | Kruskal-Wallis | | *Post-hoc* Dunn’s test | | | | | |
| --- | --- | --- | --- | --- | --- | --- | --- | --- | --- | --- | --- |
| **No PCOS (B)**  **N=67** | **PCOS (C)**  **N=25** | H | ***p*** | A-B | | A-C | | B-C | |
| Z | ***p*** | Z | ***p*** | Z | ***p*** |
| Age, years | 30.00 (26.00; 33.00) | 30.00 (26.00; 34.00) | 28.00 (24.75; 30.25) | 1.928 | 0.3814 | 0.093 | >0.9999 | 1.185 | 0.7080 | 1.336 | 0.5450 |
| BMI, kg/ | 21.40 (19.73; 23.63) | 34.25 (31.05; 38.48) | 33.50 (31.38; 36.03) | 92.48 | <0.0001 | 9.232 | <0.0001 | 6.670 | <0.0001 | 0.5463 | >0.9999 |
| TSH, mIU/mL | 2.53 (1.88; 3.30) | 2.92 (1.76; 4.31) | 2.96 (2.33; 3.92) | 5.049 | 0.0801 | 2.004 | 0.1353 | 1.818 | 0.2072 | 0.2849 | >0.9999 |
| LH, mIU/mL | 5.88 (4.45; 7.08) | 4.50 (3.35; 7.30) | 9.73 (8.55; 10.79) | 24.91 | <0.0001 | 1.315 | 0.5655 | 3.682 | 0.0007 | 4.978 | <0.0001 |
| FSH, mIU/mL | 6.49 (5.60; 7.50) | 5.82 (4.73; 7.08) | 4.44 (3.48; 5.72) | 15.34 | 0.0005 | 1.156 | 0.7428 | 3.857 | 0.0003 | 3.145 | 0.0050 |
| Estradiol, pg/mL | 47.14 (31.08; 74.52) | 31.46 (19.87; 50.54) | 38.83 (23.00; 82.53) | 10.30 | 0.0058 | 3.187 | 0.0043 | 1.124 | 0.7826 | 1.412 | 0.4739 |
| Prolactin, ng/mL | 16.26 (12.93; 21.29) | 15.62 (10.22; 19.44) | 12.91 (10.53; 20.97) | 1.144 | 0.5644 | 0.7896 | >0.9999 | 1.003 | 0.9483 | 0.4177 | >0.9999 |
| Progesterone, ng/mL | 0.70 (0.39; 0.94) | 0.53 (0.38; 0.70) | 0.67 (0.49; 1.03) | 6.381 | 0.0412 | 2.054 | 0.1200 | 0.3697 | >0.9999 | 2.070 | 0.1154 |
| Testosterone, ng/mL | 0.19 (0.10; 0.30) | 0.21 (0.14; 0.30) | 1.42 (1.09; 1.61) | 57.69 | <0.0001 | 0.9338 | >0.9999 | 7.167 | <0.0001 | 6.834 | <0.0001 |
| Insulin, uIU/mL | 7.10 (5.52; 9.69) | 17.62 (13.15; 25.05) | 15.90 (11.34; 26.04) | 58.10 | <0.0001 | 7.298 | <0.0001 | 5.264 | <0.0001 | 0.2848 | >0.9999 |
| AMH, ng/mL | 4.00 (2.62; 6.86) | 1.70 (0.72; 2.64) | 9.67 (5.89; 12.65) | 58.04 | <0.0001 | 5.132 | <0.0001 | 2.663 | 0.0232 | 7.017 | <0.0001 |
| Glucose, mmol/L | 4.79 (4.59; 5.16) | 5.31 (4.92; 5.74) | 5.23 (4.99; 5.84) | 25.49 | <0.0001 | 4.654 | <0.0001 | 3.886 | 0.0003 | 0.3084 | >0.9999 |
| Glycated hemoglobin, % | 4.54 (3.70; 5.01) | 4.08 (3.81; 5.51) | 4.30 (3.62; 5.53) | 1.829 | 0.4007 | 1.216 | 0.6717 | 1.082 | 0.8379 | 0.1533 | >0.9999 |
| Cholesterol, mmol/L | 4.19 (3.83; 4.91) | 4.89 (4.42; 6.29) | 4.58 (4.09; 5.32) | 19.70 | <0.0001 | 4.414 | <0.0001 | 1.604 | 0.3262 | 1.906 | 0.1699 |
| HDL, mmol/L | 1.50 (1.33; 1.70) | 1.21 (1.01; 1.45) | 1.07 (0.89; 1.23) | 26.81 | <0.0001 | 3.900 | 0.0003 | 4.811 | <0.0001 | 1.915 | 0.1666 |
| LDL, mmol/L | 1.98 (1.71; 2.25) | 3.12 (2.67; 3.49) | 3.02 (2.44; 3.49) | 67.85 | <0.0001 | 7.894 | <0.0001 | 5.699 | <0.0001 | 0.4072 | >0.9999 |
| Triacylglycerol, mmol/L | 0.60 (0.51; 0.81) | 1.55 (0.90; 2.53) | 1.57 (1.07; 2.17) | 51.14 | <0.0001 | 6.747 | <0.0001 | 5.158 | <0.0001 | 0.0282 | >0.9999 |
| Adiponectin, ng/mL | 16.15 (13.53; 19.40) | 8.66 (5.58; 12.67) | 7.99 (6.41; 12.25) | 47.22 | <0.0001 | 6.571 | <0.0001 | 4.790 | <0.0001 | 0.2904 | >0.9999 |
| Resistin, ng/mL | 3.74 (1.80; 5.56) | 6.54 (4.70; 11.98) | 8.09 (3.61; 9.86) | 30.95 | <0.0001 | 5.511 | <0.0001 | 3.192 | 0.0042 | 1.119 | 0.7897 |

**Table S1.** Statistical parameters including median, lower quartile, upper quartile, Kruskal-Wallis nonparametric test indicators and *post-hoc* Dunn’s test indicators. H – test statistic for Kruskal-Wallis nonparametric test; P – p-value; Z – z-score for calculation of p-value in *post-hoc* Dunn’s test; P-values<0.05 are considered significant and the corresponding cells are shaded grey. Abbreviations: AMH, anti-Müllerian hormone; BMI, body mass index; FSH, follicle-stimulating hormone; HDL, high density lipoproteins; LDL, low density lipoproteins; LH, luteinizing hormone; PCOS, polycystic ovary syndrome; TSH, thyroid-stimulating hormone
